# Supplementary material for: Comparison of Artificial Feed and Natural Food by the Growth and Blood Biochemistry in Chinese Sturgeon Acipenser sinensis
Source: MDPI journal article supplement (doi:10.3390/fishes8010045), 2023-01-10
Supplement: s1 [file s1]

## Supplementary material

**Table S1:** Summary of two-way ANOVA results on effects of feed type and season on the biochemical indicators of *Acipenser sinensis*.

| Factor             | Degree of freedom | Mean square | F      | P     |
|--------------------|-------------------|-------------|--------|-------|
| ALT                |                   |             |        |       |
| Feed type          | 1                 | 2340.694    | 34.008 | 0.000 |
| Season             | 3                 | 1194.252    | 17.351 | 0.000 |
| Feed type * Season | 3                 | 136.068     | 1.977  | 0.118 |
| AST                |                   |             |        |       |
| Feed type          | 1                 | 1086.792    | 0.521  | 0.471 |
| Season             | 3                 | 20596.274   | 9.883  | 0.000 |
| Feed type * Season | 3                 | 5444.283    | 2.612  | 0.052 |
| AST/ALT            |                   |             |        |       |
| Feed type          | 1                 | 615.490     | 8.936  | 0.003 |
| Season             | 3                 | 279.966     | 4.065  | 0.008 |
| Feed type * Season | 3                 | 22.067      | 0.320  | 0.811 |
| LDH                |                   |             |        |       |
| Feed type          | 1                 | 5830.380    | 0.038  | 0.845 |
| Season             | 3                 | 1432580.839 | 9.429  | 0.000 |
| Feed type * Season | 3                 | 202464.532  | 1.333  | 0.265 |
| ALP                |                   |             |        |       |
| Feed type          | 1                 | 533.974     | 2.116  | 0.147 |
| Season             | 3                 | 3528.892    | 13.981 | 0.000 |
| Feed type * Season | 3                 | 182.028     | 0.721  | 0.540 |
| TP                 |                   |             |        |       |
| Feed type          | 1                 | 1863.996    | 27.394 | 0.000 |
| Season             | 3                 | 882.892     | 12.975 | 0.000 |
| Feed type * Season | 3                 | 346.036     | 5.085  | 0.002 |
| ALB                |                   |             |        |       |
| Feed type          | 1                 | 1261.521    | 51.510 | 0.000 |
| Season             | 3                 | 144.541     | 5.902  | 0.001 |
| Feed type * Season | 3                 | 112.058     | 4.575  | 0.004 |
| GLO                |                   |             |        |       |
| Feed type          | 1                 | 58.616      | 2.829  | 0.090 |
| Season             | 3                 | 491.329     | 23.709 | 0.000 |
| Feed type * Season | 3                 | 71.490      | 3.450  | 0.017 |
| A/G                |                   |             |        |       |
| Feed type          | 1                 | 2.068       | 39.129 | 0.000 |
| Season             | 3                 | 1.210       | 22.898 | 0.000 |
| Feed type * Season | 3                 | 0.080       | 1.519  | 0.210 |
| CRP                |                   |             |        |       |
| Feed type          | 1                 | 1630.775    | 8.841  | 0.003 |
| Season             | 3                 | 514.109     | 2.787  | 0.041 |

|                    |   |         |         |       |
|--------------------|---|---------|---------|-------|
| Feed type * Season | 3 | 400.207 | 2.170   | 0.092 |
| TG                 |   |         |         |       |
| Feed type          | 1 | 74.204  | 28.276  | 0.000 |
| Season             | 3 | 7.598   | 2.895   | 0.036 |
| Feed type * Season | 3 | 14.241  | 5.427   | 0.001 |
| CHOL               |   |         |         |       |
| Feed type          | 1 | 126.257 | 153.322 | 0.000 |
| Season             | 3 | 2.149   | 2.610   | 0.052 |
| Feed type * Season | 3 | 3.387   | 4.112   | 0.007 |
| HDL                |   |         |         |       |
| Feed type          | 1 | 15.319  | 124.604 | 0.000 |
| Season             | 3 | 0.035   | 0.288   | 0.834 |
| Feed type * Season | 3 | 0.373   | 3.038   | 0.030 |
| LDL                |   |         |         |       |
| Feed type          | 1 | 9.899   | 155.429 | 0.000 |
| Season             | 3 | 0.656   | 10.298  | 0.000 |
| Feed type * Season | 3 | 0.248   | 3.896   | 0.010 |

---
